# Supplementary figures and images for: Primary and additional treatment preference in aggressive retinopathy of prematurity and type 1 retinopathy of prematurity
Source: HighWire-hosted journal article supplement (doi:10.1136/bmjophth-2022-001166), 2023-01-01

**Supplemental Figure 1. Flow diagram illustrating the enrollment process**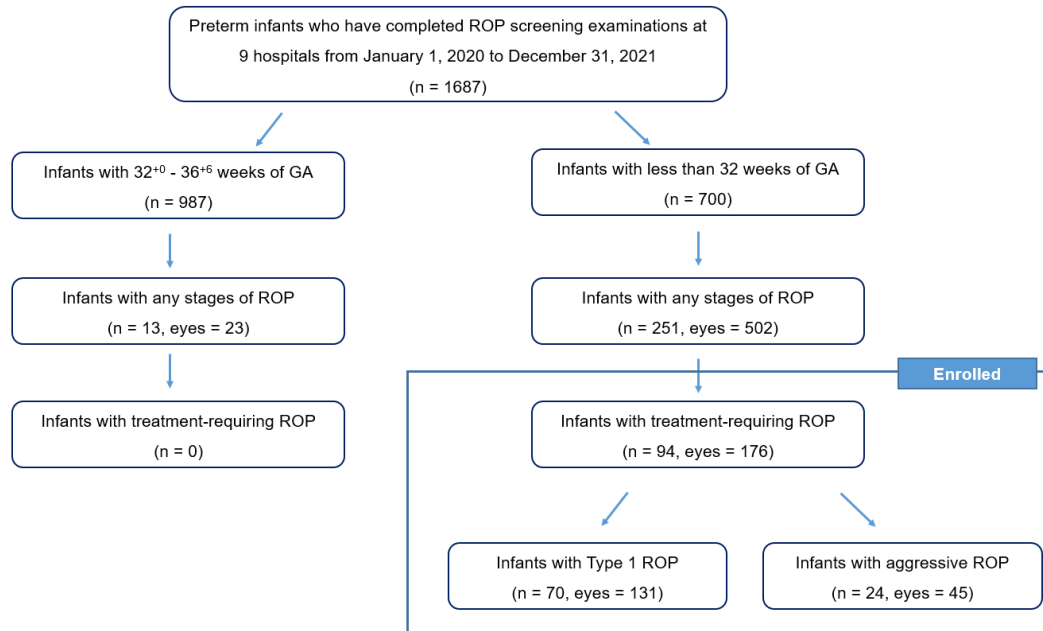

Supplement: bmjophth-2022-001166supp001_data_supplement.pdf [file bmjophth-2022-001166supp001_data_supplement.pdf]
